# Supplementary material
Source: PubMed Central journal article supplement (PMC8193440)
Supplement: 12250_2015_3673_MOESM1_ESM.pdf [file 12250_2015_3673_MOESM1_ESM.pdf]

## Electronic Supplementary Material

# Narrow distribution of cyanophage *psbA* genes observed in two paddy waters of Northeast China by an incubation experiment

Xinzhen Wang<sup>1,2</sup>, Ruiyong Jing<sup>1,3</sup>, Junjie Liu<sup>1</sup>, Zhenhua Yu<sup>1</sup>, Jian Jin<sup>1</sup>, Xiaobing Liu<sup>1</sup>, Xiaojuan Wang<sup>4</sup>, Guanghua Wang<sup>1</sup>✉

1. Key Laboratory of Mollisols Agroecology, Northeast Institute of Geography and Agroecology, Chinese Academy of Sciences, Harbin 150081, China
2. University of Chinese Academy of Sciences, Beijing 100049, China
3. College of Life and Sci-technology, Heilongjiang BaYi Agricultural University, Daqing 163319, China
4. Centre for AgriBioscience, La Trobe University, Melbourne Campus, Bundoora, Vic 3086, Australia

Supporting information to DOI: 10.1007/s12250-015-3673-5

Table S1. The closest relative of sequenced *psbA* clones from paddy waters in this study at the amino acid level.

| Clone name (PW-) | Length <sup>a</sup> | Alignment | Closest relative   | Source                            | Accession number <sup>b</sup> | Identity (%) |
|------------------|---------------------|-----------|--------------------|-----------------------------------|-------------------------------|--------------|
| DA-I-1           | 264                 | 263/264   | NoF9               | Paddy floodwater in Japan         | BAH23189                      | 99           |
| DA-I-2           | 264                 | 258/264   | CM6                | Paddy floodwater in Japan         | BAH23213                      | 98           |
| DA-I-3           | 264                 | 261/264   | NoF10              | Paddy floodwater in Japan         | BAH23190                      | 99           |
| DA-I-4           | 264                 | 255/264   | NoF10              | Paddy floodwater in Japan         | BAH23190                      | 97           |
| DA-I-5           | 264                 | 257/264   | CF(-N)9            | Paddy floodwater in Japan         | BAH23199                      | 97           |
| DA-I-6           | 264                 | 259/264   | NoF10              | Paddy floodwater in Japan         | BAH23190                      | 98           |
| DA-I-7           | 264                 | 254/264   | NoF10              | Paddy floodwater in Japan         | BAH23190                      | 96           |
| DA-I-8           | 264                 | 260/264   | NoF10              | Paddy floodwater in Japan         | BAH23190                      | 98           |
| DA-I-9           | 264                 | 256/264   | LK20mp-22          | Freshwater lake Kinneret (Israel) | AAZ93918                      | 97           |
| DA-I-10          | 264                 | 263/264   | NoF9               | Paddy floodwater in Japan         | BAH23189                      | 99           |
| DA-I-11          | 264                 | 258/264   | PN09-068           | Clone in East China Sea           | AGL79161                      | 98           |
| DA-I-12          | 264                 | 259/264   | NoF9               | Paddy floodwater in Japan         | BAH23189                      | 98           |
| DA-I-14          | 264                 | 262/264   | NoF9               | Paddy floodwater in Japan         | BAH23189                      | 99           |
| DA-I-15          | 264                 | 259/264   | NoF10              | Paddy floodwater in Japan         | BAH23190                      | 98           |
| DA-I-16          | 264                 | 258/264   | CF(-N)9            | Paddy floodwater in Japan         | BAH23199                      | 98           |
| DA-I-17          | 264                 | 261/264   | NoF10              | Paddy floodwater in Japan         | BAH23190                      | 99           |
| DA-I-19          | 264                 | 261/264   | NoF10              | Paddy floodwater in Japan         | BAH23190                      | 99           |
| DA-I-20          | 264                 | 258/264   | NoF10              | Paddy floodwater in Japan         | BAH23190                      | 98           |
| DA-I-21          | 264                 | 260/264   | NoF10              | Paddy floodwater in Japan         | BAH23190                      | 98           |
| DA-I-22          | 264                 | 255/264   | NoF10              | Paddy floodwater in Japan         | BAH23190                      | 97           |
| DA-I-23          | 264                 | 260/264   | NoF9               | Paddy floodwater in Japan         | BAH23189                      | 98           |
| DA-I-24          | 264                 | 248/264   | CF(-N)7            | Paddy floodwater in Japan         | BAH23197                      | 94           |
| DA-I-25          | 264                 | 258/264   | CF(-N)9            | Paddy floodwater in Japan         | BAH23199                      | 98           |
| DA-I-26          | 264                 | 254/264   | CM10               | Paddy floodwater in Japan         | BAH23217                      | 96           |
| DA-I-27          | 264                 | 260/264   | NoF9               | Paddy floodwater in Japan         | BAH23189                      | 98           |
| DA-I-28          | 264                 | 261/264   | NoF10              | Paddy floodwater in Japan         | BAH23190                      | 99           |
| DA-I-29          | 264                 | 262/264   | NoF9               | Paddy floodwater in Japan         | BAH23189                      | 99           |
| DA-I-30          | 264                 | 260/264   | NoF9               | Paddy floodwater in Japan         | BAH23189                      | 98           |
| DA-I-31          | 264                 | 259/264   | PN09-068           | Clone in East China Sea           | AGL79161                      | 98           |
| DA-I-32          | 264                 | 258/264   | PN04-091           | Clone in East China Sea           | AGL79481                      | 98           |
| DA-I-33          | 264                 | 260/264   | NoF7               | Paddy floodwater in Japan         | BAH23187                      | 98           |
| DA-I-34          | 264                 | 252/264   | NoF10              | Paddy floodwater in Japan         | BAH23190                      | 95           |
| DA-I-35          | 264                 | 256/264   | LK20mP-22          | Freshwater lake Kinneret (Israel) | AAZ93918                      | 97           |
| DA-I-37          | 264                 | 258/264   | PN09-068           | Clone in East China Sea           | AGL79161                      | 98           |
| DA-I-38          | 264                 | 261/263   | Cyanophage S-RIM17 | Coastal marine cyanophage         | ACY42497                      | 99           |
| DA-I-39          | 264                 | 259/264   | NoF10              | Paddy floodwater in Japan         | BAH23190                      | 98           |
| DA-I-40          | 264                 | 256/264   | DH22-026           | Clone in East China Sea           | AGL78823                      | 97           |
| DA-I-41          | 264                 | 262/264   | Cyanophage S-RIM17 | Coastal marine cyanophage         | ACY42497                      | 99           |
| DA-I-42          | 264                 | 254/264   | NoF10              | Paddy floodwater in Japan         | BAH23190                      | 96           |
| DA-I-43          | 264                 | 255/264   | NoF10              | Paddy floodwater in Japan         | BAH23190                      | 97           |

To be continued

| Clone name (PW-) | Length <sup>a</sup> | Alignment | Closest relative   | Source                            | Accession number <sup>b</sup> | Identity (%) |
|------------------|---------------------|-----------|--------------------|-----------------------------------|-------------------------------|--------------|
| DA-I-44          | 264                 | 253/264   | NoF10              | Paddy floodwater in Japan         | BAH23190                      | 96           |
| DA-I-45          | 264                 | 252/264   | CM10               | Paddy floodwater in Japan         | BAH23217                      | 95           |
| DA-I-46          | 264                 | 257/264   | CF(-N)9            | Paddy floodwater in Japan         | BAH23199                      | 97           |
| DA-I-47          | 264                 | 258/263   | Cyanophage S-RIM17 | Coastal marine cyanophage         | ACY42497                      | 98           |
| DA-I-48          | 264                 | 255/264   | NoF10              | Paddy floodwater in Japan         | BAH23190                      | 97           |
| DA-I-49          | 264                 | 257/264   | PN09-068           | Clone in East China Sea           | AGL79161                      | 97           |
| DA-I-50          | 264                 | 248/264   | CF(-N)7            | Paddy floodwater in Japan         | BAH23197                      | 94           |
| DA-I-51          | 264                 | 259/264   | NoF10              | Paddy floodwater in Japan         | BAH23190                      | 98           |
| DA-I-52          | 264                 | 255/264   | CF(-N)7            | Paddy floodwater in Japan         | BAH23197                      | 97           |
| DA-I-53          | 264                 | 254/264   | NoF10              | Paddy floodwater in Japan         | BAH23190                      | 96           |
| DA-I-54          | 264                 | 258/264   | NoF10              | Paddy floodwater in Japan         | BAH23190                      | 98           |
| DA-I-55          | 264                 | 261/264   | NoF10              | Paddy floodwater in Japan         | BAH23190                      | 99           |
| DA-I-56          | 264                 | 259/264   | PN04-056           | Clone in East China Sea           | AGL79446                      | 98           |
| DA-I-57          | 264                 | 259/264   | NoF10              | Paddy floodwater in Japan         | BAH23190                      | 98           |
| DA-I-58          | 264                 | 257/264   | NoF10              | Paddy floodwater in Japan         | BAH23190                      | 97           |
| DA-I-59          | 264                 | 258/264   | PN09-068           | Clone in East China Sea           | AGL79161                      | 98           |
| DA-I-60          | 264                 | 260/264   | NoF10              | Paddy floodwater in Japan         | BAH23190                      | 98           |
| DA-I-61          | 264                 | 256/264   | LK20mp-22          | Freshwater lake Kinneret (Israel) | AAZ93918                      | 97           |
| DA-I-62          | 264                 | 252/264   | CM10               | Paddy floodwater in Japan         | BAH23217                      | 95           |
| DA-I-63          | 264                 | 254/264   | CF(-N)8            | Paddy floodwater in Japan         | BAH23198                      | 96           |
| DA-I-64          | 264                 | 249/264   | CF(-N)7            | Paddy floodwater in Japan         | BAH23197                      | 94           |
| DA-I-65          | 264                 | 254/264   | NoF10              | Paddy floodwater in Japan         | BAH23190                      | 96           |
| DA-I-66          | 264                 | 258/264   | CF(-N)9            | Paddy floodwater in Japan         | BAH23199                      | 98           |
| DA-I-67          | 264                 | 257/264   | NoF10              | Paddy floodwater in Japan         | BAH23190                      | 97           |
| DA-I-68          | 264                 | 258/264   | PN09-068           | Clone in East China Sea           | AGL79161                      | 98           |
| DA-I-69          | 264                 | 257/264   | PN09-068           | Clone in East China Sea           | AGL79161                      | 97           |
| DA-I-70          | 264                 | 259/264   | NoF10              | Paddy floodwater in Japan         | BAH23190                      | 98           |
| DA-I-71          | 264                 | 260/264   | NoF10              | Paddy floodwater in Japan         | BAH23190                      | 98           |
| DA-I-72          | 264                 | 251/264   | NoF10              | Paddy floodwater in Japan         | BAH23190                      | 95           |
| DA-I-73          | 264                 | 251/264   | CM9                | Paddy floodwater in Japan         | BAH23216                      | 95           |
| DA-II-2          | 264                 | 258/264   | NoF10              | Paddy floodwater in Japan         | BAH23190                      | 98           |
| DA-II-3          | 264                 | 258/264   | NoF10              | Paddy floodwater in Japan         | BAH23190                      | 98           |
| DA-II-4          | 264                 | 259/264   | NoF10              | Paddy floodwater in Japan         | BAH23190                      | 98           |
| DA-II-5          | 264                 | 259/264   | NoF10              | Paddy floodwater in Japan         | BAH23190                      | 98           |
| DA-II-6          | 264                 | 261/264   | CF(-N)1            | Paddy floodwater in Japan         | BAH23191                      | 99           |
| DA-II-7          | 264                 | 260/264   | CF(-N)1            | Paddy floodwater in Japan         | BAH23191                      | 98           |
| DA-II-8          | 264                 | 259/264   | NoF10              | Paddy floodwater in Japan         | BAH23190                      | 98           |
| DA-II-9          | 264                 | 261/264   | CM7                | Paddy floodwater in Japan         | BAH23214                      | 99           |
| DA-II-10         | 264                 | 261/264   | CF(-N)1            | Paddy floodwater in Japan         | BAH23191                      | 99           |
| DA-II-11         | 264                 | 261/264   | NoF10              | Paddy floodwater in Japan         | BAH23190                      | 99           |

| Clone name (PW-) | Length <sup>a</sup> | Alignment | Closest relative                  | Source                            | Accession number <sup>b</sup> | Identity (%) |
|------------------|---------------------|-----------|-----------------------------------|-----------------------------------|-------------------------------|--------------|
| DA-II-12         | 264                 | 260/264   | NoF10                             | Paddy floodwater in Japan         | BAH23190                      | 98           |
| DA-II-13         | 264                 | 259/264   | NoF10                             | Paddy floodwater in Japan         | BAH23190                      | 98           |
| DA-II-14         | 264                 | 258/264   | CF(-N)1                           | Paddy floodwater in Japan         | BAH23191                      | 98           |
| DA-II-15         | 262                 | 261/264   | CF(-N)1                           | Paddy floodwater in Japan         | BAH23191                      | 99           |
| DA-II-16         | 264                 | 257/264   | NoF10                             | Paddy floodwater in Japan         | BAH23190                      | 97           |
| DA-II-17         | 264                 | 261/264   | CF(-N)1                           | Paddy floodwater in Japan         | BAH23191                      | 99           |
| DA-II-18         | 264                 | 261/264   | NoF10                             | Paddy floodwater in Japan         | BAH23190                      | 99           |
| DA-II-19         | 262                 | 259/264   | CF(-N)1                           | Paddy floodwater in Japan         | BAH23191                      | 98           |
| DA-II-20         | 264                 | 260/264   | CF(-N)1                           | Paddy floodwater in Japan         | BAH23191                      | 98           |
| DA-II-21         | 264                 | 258/264   | NoF10                             | Paddy floodwater in Japan         | BAH23190                      | 98           |
| DA-II-22         | 264                 | 260/264   | NoF10                             | Paddy floodwater in Japan         | BAH23190                      | 98           |
| DA-II-23         | 264                 | 259/264   | CF(-N)1                           | Paddy floodwater in Japan         | BAH23191                      | 98           |
| DA-II-24         | 264                 | 258/264   | CF(-N)1                           | Paddy floodwater in Japan         | BAH23191                      | 98           |
| DA-II-25         | 264                 | 261/264   | NoF10                             | Paddy floodwater in Japan         | BAH23190                      | 99           |
| DA-II-26         | 264                 | 260/264   | CF(-N)1                           | Paddy floodwater in Japan         | BAH23191                      | 98           |
| DA-II-27         | 264                 | 256/264   | NoF10                             | Paddy floodwater in Japan         | BAH23190                      | 97           |
| DA-II-28         | 264                 | 259/264   | NoF10                             | Paddy floodwater in Japan         | BAH23190                      | 98           |
| DA-II-29         | 264                 | 257/264   | CM10                              | Paddy floodwater in Japan         | BAH23217                      | 97           |
| DA-II-30         | 264                 | 260/264   | CF(-N)1                           | Paddy floodwater in Japan         | BAH23191                      | 98           |
| DA-II-31         | 264                 | 260/264   | NoF10                             | Paddy floodwater in Japan         | BAH23190                      | 98           |
| DA-II-32         | 264                 | 259/264   | NoF10                             | Paddy floodwater in Japan         | BAH23190                      | 98           |
| DA-II-33         | 264                 | 259/264   | CF(-N)1                           | Paddy floodwater in Japan         | BAH23191                      | 98           |
| DA-II-34         | 264                 | 260/264   | CF(-N)1                           | Paddy floodwater in Japan         | BAH23191                      | 98           |
| DA-II-35         | 264                 | 259/264   | NoF10                             | Paddy floodwater in Japan         | BAH23190                      | 98           |
| DA-II-36         | 264                 | 258/264   | NoF10                             | Paddy floodwater in Japan         | BAH23190                      | 98           |
| DA-III-1         | 264                 | 261/264   | NoF10                             | Paddy floodwater in Japan         | BAH23190                      | 99           |
| DA-III-2         | 264                 | 259/264   | NoF10                             | Paddy floodwater in Japan         | BAH23190                      | 98           |
| DA-III-3         | 264                 | 260/264   | NoF10                             | Paddy floodwater in Japan         | BAH23190                      | 98           |
| DA-III-4         | 264                 | 259/264   | NoF10                             | Paddy floodwater in Japan         | BAH23190                      | 98           |
| DA-III-5         | 264                 | 259/264   | NoF10                             | Paddy floodwater in Japan         | BAH23190                      | 98           |
| DA-III-6         | 264                 | 258/264   | CF(-N)1                           | Paddy floodwater in Japan         | BAH23191                      | 98           |
| DA-III-7         | 264                 | 255/264   | NoF10                             | Paddy floodwater in Japan         | BAH23190                      | 97           |
| DA-III-8         | 264                 | 259/264   | NoF10                             | Paddy floodwater in Japan         | BAH23190                      | 98           |
| DA-III-9         | 264                 | 255/264   | NoF10                             | Paddy floodwater in Japan         | BAH23190                      | 97           |
| DA-III-10        | 264                 | 254/264   | CF(-N)1                           | Paddy floodwater in Japan         | BAH23191                      | 96           |
| DA-III-11        | 264                 | 260/264   | NoF10                             | Paddy floodwater in Japan         | BAH23190                      | 98           |
| DA-III-12        | 264                 | 257/264   | CF(-N)1                           | Paddy floodwater in Japan         | BAH23191                      | 97           |
| MDJ-I-1          | 264                 | 256/264   | <i>Synechococcus</i> phage S-CBP3 | Isolation in Chesapeake Bay       | AFK66481                      | 97           |
| MDJ-I-2          | 264                 | 261/264   | NoF10                             | Paddy floodwater in Japan         | BAH23190                      | 99           |
| MDJ-I-3          | 264                 | 257/264   | NoF10                             | Paddy floodwater in Japan         | BAH23190                      | 97           |
| MDJ-I-4          | 264                 | 257/264   | CF(-N)1                           | Paddy floodwater in Japan         | BAH23191                      | 97           |
| MDJ-I-5          | 264                 | 260/264   | LK20mP-12                         | Freshwater lake Kinneret (Israel) | AAZ93917                      | 98           |

| Clone name (PW-) | Length <sup>a</sup> | Alignment | Closest relative                    | Source                        | Accession number <sup>b</sup> | Identity (%) |
|------------------|---------------------|-----------|-------------------------------------|-------------------------------|-------------------------------|--------------|
| MDJ-I-6          | 264                 | 255/264   | uncultured <i>Synechococcus</i> sp. | Transect cruise at eastern    | AAU84542                      | 97           |
| MDJ-I-7          | 264                 | 262/264   | <i>Nostoc</i> sp. PCC7107           | Unknown                       | WP_015112088                  | 99           |
| MDJ-I-8          | 264                 | 260/264   | NoF10                               | Paddy floodwater in Japan     | BAH23190                      | 98           |
| MDJ-II-1         | 264                 | 258/264   | PN09-068                            | Clone in East China Sea       | AGL76161                      | 98           |
| MDJ-II-2         | 264                 | 260/264   | CF(-N)1                             | Paddy floodwater in Japan     | BAH23191                      | 98           |
| MDJ-II-3         | 264                 | 261/264   | NoF10                               | Paddy floodwater in Japan     | BAH23190                      | 99           |
| MDJ-II-4         | 264                 | 259/264   | CF(-N)9                             | Paddy floodwater in Japan     | BAH23199                      | 98           |
| MDJ-II-5         | 264                 | 261/264   | NoF10                               | Paddy floodwater in Japan     | BAH23190                      | 99           |
| MDJ-II-6         | 264                 | 258/264   | NoF10                               | Paddy floodwater in Japan     | BAH23190                      | 98           |
| MDJ-II-7         | 264                 | 258/264   | NoF10                               | Paddy floodwater in Japan     | BAH23190                      | 98           |
| MDJ-II-8         | 264                 | 258/264   | NoF10                               | Paddy floodwater in Japan     | BAH23190                      | 98           |
| MDJ-II-9         | 264                 | 262/264   | NoF10                               | Paddy floodwater in Japan     | BAH23190                      | 99           |
| MDJ-II-10        | 264                 | 260/264   | NoF10                               | Paddy floodwater in Japan     | BAH23190                      | 98           |
| MDJ-II-11        | 264                 | 260/264   | NoF10                               | Paddy floodwater in Japan     | BAH23190                      | 98           |
| MDJ-II-12        | 264                 | 254/264   | <i>Synechococcus</i> phage S-CBP3   | Isolation in Chesapeake Bay   | AFK66481                      | 96           |
| MDJ-III-1        | 263                 | 257/264   | NoF10                               | Paddy floodwater in Japan     | BAH23190                      | 97           |
| MDJ-III-2        | 264                 | 261/264   | CF(-N)1                             | Paddy floodwater in Japan     | BAH23191                      | 99           |
| MDJ-III-3        | 264                 | 260/264   | CF(-N)1                             | Paddy floodwater in Japan     | BAH23191                      | 98           |
| MDJ-III-4        | 264                 | 256/264   | NoF10                               | Paddy floodwater in Japan     | BAH23190                      | 97           |
| MDJ-III-5        | 264                 | 258/264   | NoF10                               | Paddy floodwater in Japan     | BAH23190                      | 98           |
| MDJ-III-6        | 264                 | 257/264   | NoF10                               | Paddy floodwater in Japan     | BAH23190                      | 97           |
| MDJ-III-7        | 264                 | 260/264   | CF(-N)1                             | Paddy floodwater in Japan     | BAH23191                      | 98           |
| MDJ-III-8        | 264                 | 257/264   | NoF10                               | Paddy floodwater in Japan     | BAH23190                      | 97           |
| MDJ-III-9        | 264                 | 257/264   | NoF10                               | Paddy floodwater in Japan     | BAH23190                      | 97           |
| MDJ-III-10       | 264                 | 260/264   | NoF10                               | Paddy floodwater in Japan     | BAH23190                      | 98           |
| MDJ-III-11       | 264                 | 257/264   | NoF10                               | Paddy floodwater in Japan     | BAH23190                      | 97           |
| MDJ-III-12       | 264                 | 257/264   | NoF10                               | Paddy floodwater in Japan     | BAH23190                      | 97           |
| MDJ-III-13       | 264                 | 257/264   | NoF10                               | Paddy floodwater in Japan     | BAH23190                      | 97           |
| MDJ-III-14       | 264                 | 247/264   | <i>Anabaena oryzae</i> Ind3         | Unpublished                   | AEZ50165                      | 94           |
| MDJ-III-15       | 264                 | 258/264   | NoF10                               | Paddy floodwater in Japan     | BAH23190                      | 98           |
| MDJ-III-16       | 264                 | 257/264   | NoF10                               | Paddy floodwater in Japan     | BAH23190                      | 97           |
| MDJ-III-17       | 264                 | 257/264   | NoF10                               | Paddy floodwater in Japan     | BAH23190                      | 97           |
| MDJ-III-18       | 264                 | 262/264   | NoF7                                | Paddy floodwater in Japan     | BAH23187                      | 99           |
| MDJ-III-19       | 264                 | 260/264   | <i>Trebouxiophyceae</i> sp.MX-A201  | Highly acidic Geothermal Lake | YP_006666440                  | 98           |
| MDJ-III-20       | 264                 | 257/264   | NoF10                               | Paddy floodwater in Japan     | BAH23190                      | 97           |
| MDJ-III-21       | 264                 | 261/264   | CF(-N)1                             | Paddy floodwater in Japan     | BAH23191                      | 99           |
| MDJ-III-22       | 264                 | 259/264   | CF(-N)1                             | Paddy floodwater in Japan     | BAH23191                      | 98           |
| MDJ-III-23       | 264                 | 254/264   | NoF10                               | Paddy floodwater in Japan     | BAH23190                      | 96           |

NOTE: <sup>a</sup>The length of amino acid residues; <sup>b</sup>Accession number of amino acid sequences
